# Supplementary material for: Rh(ii)-catalysed room temperature aziridination of homoallyl-carbamates
Source: Royal Society of Chemistry journal article supplement (doi:10.1039/b611662k), 2006-01-01
Supplement: b611662k.pdf [file b611662k.pdf]

Supplementary Material (ESI) for Chemical Communications  
This journal is (c) The Royal Society of Chemistry 2006  
SUPPORTING INFORMATION  
**Rh(II)-Catalysed Room Temperature Aziridination of Homoallyl-Carbamates**

Christopher J. Hayes,<sup>\*a</sup> Peter W. Beavis<sup>a</sup> and Lesley A. Humphries<sup>b</sup>

<sup>a</sup>*School of Chemistry, University of Nottingham, University Park, Nottingham, NG7 2RD, UK*

<sup>b</sup>*GlaxoSmithKline, Medicines Research Centre, Gunnels Wood Road, Stevenage, SG1 2NY, UK*

### **General Procedures**

Reactions were performed in flame-dried glassware under an atmosphere of argon. Starting materials were obtained from commercial suppliers and used without further purification. C<sub>6</sub>H<sub>6</sub> was distilled from CaH<sub>2</sub> and stored over 3 Å MS before use. Molecular sieves were activated by heating over a Bunsen flame under reduced pressure. Thin layer chromatography was carried out on Merck silica 60 gel glass-backed plates. Plates were visualised by exposure to UV light followed by staining with basic potassium permanganate solution. Flash chromatography was carried out using Merck silica gel 60 as the stationary phase. Melting points were recorded on Gallenkamp MPD350.BM2.5 apparatus and are uncorrected. Microanalytical data were obtained using an Exeter Analytical CE-440 elemental analyser. Proton NMR spectra were recorded using either a Bruker DRX500 or AV400 MHz spectrometer at 298 K. Data are expressed as chemical shifts in parts per million (p.p.m.) relative to residual chloroform ( $\delta$  7.27) as internal standard on the  $\delta$  scale. The multiplicity of each signal is designated by the following abbreviations: s, singlet; d, doublet; t, triplet; q, quartet; app, apparent; b, broad. All coupling constants are quoted in Hertz (Hz). Carbon NMR spectra were recorded using Bruker DRX500 or AV400 MHz spectrometers at 298 K. Data are expressed as chemical shifts in p.p.m. relative to D-chloroform ( $\delta$  77.16) as internal standard on the  $\delta$  scale. Infra-red spectra were recorded using a Nicolet Avatar 320 FT-IR spectrophotometer

using liquid films or ATR for solids. High-resolution mass spectra were acquired on VG micromass 70E and MM70E instruments using electron ionisation (EI), chemical ionisation (CI) and electrospray ionisation (ES). All carbamates were prepared from the corresponding alcohol following the general procedure of Kocovsky.<sup>1</sup> Iodosylbenzene, PhIO, was prepared according to the procedure of Sharefkin and Saltzman.<sup>2</sup> Enantiomeric excesses (*e.e.*) were determined by integration of the specified peaks in the <sup>1</sup>H-NMR spectrum, using the given mass of compound in solvent (1.5 mL), with the specified loading of europium tris[3-(heptafluoropropylhydroxymethylene)-(+)-camphorate], Eu(hfc)<sub>3</sub>, chiral shift reagent.

#### General Procedure A

Carbamate, iodobenzene diacetate, PhI(OAc)<sub>2</sub>, (2.0 eq.), MgO (3.3 eq.), and rhodium(II) acetate dimer, Rh<sub>2</sub>(OAc)<sub>4</sub>, (0.05 eq.) were stirred at 23 °C in CH<sub>2</sub>Cl<sub>2</sub> (0.1 M solution of carbamate) for 24 h. The reaction mixture was then filtered through Celite<sup>®</sup> and the filter cake washed with CH<sub>2</sub>Cl<sub>2</sub>. The filtrate was concentrated under reduced pressure and the resulting crude oil was purified by flash column chromatography over silica, SiO<sub>2</sub>.

#### General Procedure B

Carbamate, PhIO (2.0 eq.) and rhodium dimer catalyst (0.05 eq.) were stirred at 23 °C in benzene (0.1 M solution of carbamate) for 24 h. over activated 3 Å molecular sieves. The reaction mixture was then filtered through Celite<sup>®</sup> and the filter cake washed with

---

<sup>1</sup> Kocovsky, P. *Tetrahedron Lett.* 1986, **27**, 5521-5524.

<sup>2</sup> Saltzman, H.; Sharefkin, J. G. *Org. Synth.*, 1973, **5**, 658-659.

Supplementary Material (ESI) for Chemical Communications  
This journal is (c) The Royal Society of Chemistry 2006  
SUPPORTING INFORMATION

CH<sub>2</sub>Cl<sub>2</sub>. The filtrate was concentrated under reduced pressure and the resulting crude oil was purified by flash column chromatography over SiO<sub>2</sub>.

***Trans*-7-ethyl-3-oxa-1-aza-bicyclo[4.1.0]heptan-2-one (2a) & ((*E*)-4-but-1-enyl)-oxazolidin-2-one (2b)**

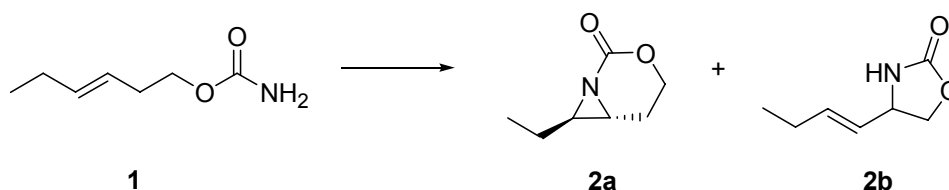

Prepared following General Procedure A with carbamic acid (*E*)-hex-3-enyl ester **1** (201.7 mg, 1.41 mmol), PhI(OAc)<sub>2</sub> (0.907 g, 2.82 mmol), MgO (0.187 g, 4.65 mmol) and Rh<sub>2</sub>(OAc)<sub>4</sub> (31.1 mg, 0.071 mmol) and CH<sub>2</sub>Cl<sub>2</sub> (14.1 mL). Purification was by flash column chromatography over SiO<sub>2</sub> (petroleum ether 40-60/Et<sub>2</sub>O (1:4)) to afford recovered **1** (27.2 mg, 13 %). Further elution afforded **2b** (52.7 mg, 26 %) as a yellow oil: R<sub>f</sub> = 0.21 (petroleum ether 40-60/Et<sub>2</sub>O (1:4)); ν<sub>max</sub>/cm<sup>-1</sup> (film) 3286, 2966, 2934, 1754; δ<sub>H</sub> (400 MHz, CDCl<sub>3</sub>) 5.78 (1H, dtd, *J* 15.3, 6.3, 0.5), 5.41 (2H, bs & ddt, *J* 15.3, 8.0, 1.6), 4.51 (1H, appt, *J* 8.5), 4.38 – 4.33 (1H, m), 4.04 (1H, dd, *J* 8.5, 7.0), 2.11 – 2.04 (2H, m), 1.01 (3H, t, *J* 7.5); δ<sub>C</sub> (400 MHz, CDCl<sub>3</sub>) 159.5 (C), 137.7 (CH), 126.6 (CH), 70.5 (CH<sub>2</sub>), 55.2 (CH), 25.2 (CH<sub>2</sub>), 13.2 (CH<sub>3</sub>); *m/z* (ES<sup>+</sup>) 142.0867 (M+H, C<sub>7</sub>H<sub>12</sub>NO<sub>2</sub> requires 142.0868), 174 (100 %, M+MeOH+H), 164 (20, M+Na) 142 (98, M+H). Further elution afforded **2a** (90.6 mg, 46 %) as a yellow oil: R<sub>f</sub> = 0.12 (petroleum ether 40-60/Et<sub>2</sub>O (1:4)); ν<sub>max</sub>/cm<sup>-1</sup> (film) 2968, 2933, 2877, 1720, 1464; δ<sub>H</sub> (400 MHz, CDCl<sub>3</sub>) 4.40 (1H, ddd, *J* 12.5, 10.6, 1.9), 4.29 (1H, ddd, *J* 10.6, 4.2, 1.9), 2.60 (1H, ddd, *J* 9.0, 6.2, 3.3), 2.35 (1H, ddt, *J* 14.6, 6.2, 1.9), 2.23 (1H, apptd, *J* 6.0, 3.3), 1.66 – 1.59 (2H, m),

Supplementary Material (ESI) for Chemical Communications

This journal is (c) The Royal Society of Chemistry 2006

SUPPORTING INFORMATION

1.44 – 1.34 (1H, m), 1.06 (3H, t,  $J$  7.4);  $\delta_C$  (400 MHz, CDCl<sub>3</sub>) 161.0 (C), 68.2 (CH<sub>2</sub>), 50.1 (CH), 40.0 (CH), 25.2 (CH<sub>2</sub>), 25.1 (CH<sub>2</sub>), 10.6 (CH<sub>3</sub>);  $m/z$  (ES<sup>+</sup>) 142.0874 (M+H, C<sub>7</sub>H<sub>12</sub>NO<sub>2</sub> requires 142.0868), 164 (100 %, M+Na), 142 (31, M+H).

Prepared following General Procedure B with carbamic acid (*E*)-hex-3-enyl ester **1** (200.2 mg, 1.40 mmol), PhIO (0.615 g, 2.80 mmol), Rh<sub>2</sub>(OAc)<sub>4</sub> (30.9 mg, 0.070 mmol) and benzene (14.0 mL). Purification was by flash column chromatography (petroleum ether 40-60/Et<sub>2</sub>O (1:4)) yielding **2b** (27.6 mg, 14 %). The data were identical with those reported previously (*vide supra*). Further elution afforded **2a** (134.2 mg, 68 %). The data were identical with those reported previously (*vide supra*).

Prepared following General Procedure B with carbamic acid (*E*)-hex-3-enyl ester **1** (205.1 mg, 1.43 mmol), PhIO (0.630 g, 2.86 mmol), Rh<sub>2</sub>(Oct)<sub>4</sub> (55.8 mg, 0.072 mmol) and benzene (14.3 mL). Purification was by flash column chromatography (petroleum ether 40-60/Et<sub>2</sub>O (1:4)) yielding **2b** (11.4 mg, 6 %). The data were identical with those reported previously (*vide supra*). Further elution afforded **2a** (143.5 mg, 71 %). The data were identical with those reported previously (*vide supra*).

Prepared following General Procedure B with carbamic acid (*E*)-hex-3-enyl ester **1** (208.3 mg, 1.46 mmol), PhIO (0.640 g, 2.92 mmol), Rh<sub>2</sub>(*S*-TBSP)<sub>4</sub> (105.3 mg, 0.073 mmol) and benzene (14.5 mL). Purification was by flash column chromatography (petroleum ether 40-60/Et<sub>2</sub>O (1:4)) yielding **2b** (25.4 mg, 12 %). The data were identical with those reported previously (*vide supra*). Further elution afforded **2a** (135.6 mg, 66

%). The data were identical with those reported previously (*vide supra*); *e.e.* 6 % (**2a** (7.7 mg), 10 mol% Eu(hfc)<sub>3</sub>, C<sub>6</sub>D<sub>6</sub>, CH<sub>3</sub>, 1.01/1.06 p.p.m. 1:0.88).

**((E)-4-But-1-enyl)-oxazolidin-2-one (2b)**

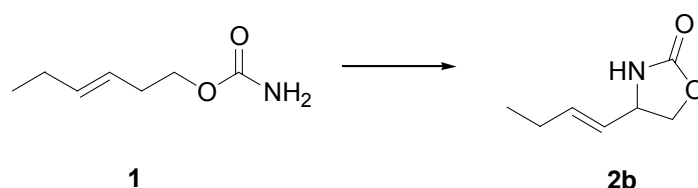

Prepared following General Procedure B with carbamic acid (*E*)-hex-3-enyl ester **1** (40.9 mg, 0.29 mmol), PhIO (0.126 g, 0.58 mmol), Rh<sub>2</sub>(*S*-MeOX)<sub>4</sub> (12.3 mg, 0.015 mmol) and benzene (2.9 mL). Purification was by flash column chromatography (petroleum ether 40-60/Et<sub>2</sub>O (1:4)) yielding **2b** (16.4 mg, 40 %). The data were identical with those reported previously (*vide supra*); *e.e.* 23% (**2b** (3.1 mg), 5 mol% Eu(hfc)<sub>3</sub>, CDCl<sub>3</sub>, CH<sub>3</sub>, 0.90/0.94 p.p.m. 1:0.62).

***Cis*-7-ethyl-3-oxa-1-aza-bicyclo[4.1.0]heptan-2-one (4a) & ((Z)-4-but-1-enyl)-oxazolidin-2-one (4b)**

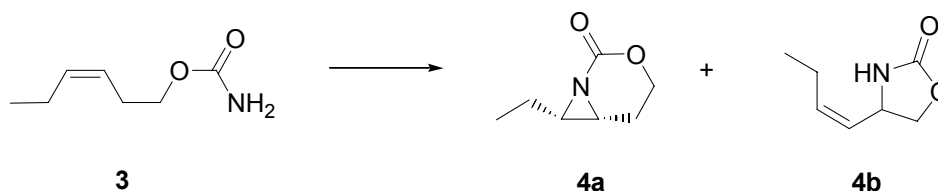

Prepared following General Procedure A with carbamic acid (*Z*)-hex-3-enyl ester **3** (201.0 mg, 1.40 mmol), PhI(OAc)<sub>2</sub> (0.904 g, 2.80 mmol), MgO (0.187 g, 4.62 mmol) and Rh<sub>2</sub>(OAc)<sub>4</sub> (31.0 mg, 0.070 mmol) and CH<sub>2</sub>Cl<sub>2</sub> (14.0 mL). Purification was by flash

## Supplementary Material (ESI) for Chemical Communications

This journal is (c) The Royal Society of Chemistry 2006

## SUPPORTING INFORMATION

column chromatography over SiO<sub>2</sub> (petroleum ether 40-60/Et<sub>2</sub>O (1:4)) to afford recovered **3** (39.6 mg, 20 %). Further elution afforded **4b** (37.1 mg, 19 %) as a yellow oil: R<sub>f</sub> = 0.24 (petroleum ether 40-60/Et<sub>2</sub>O (1:4));  $\nu_{\max}/\text{cm}^{-1}$  (film) 3280, 2967, 2935, 1752;  $\delta_{\text{H}}$  (400 MHz, CDCl<sub>3</sub>) 5.76 (1H, bs), 5.64 (1H, dtd, *J* 10.8, 7.6, 1.0), 5.38 (1H, dtd, *J* 10.8, 9.0, 1.5), 4.77 – 4.71 (1H, m), 4.52 (1H, appt, *J* 8.5), 4.00 (1H, dd, *J* 8.5, 7.4), 2.17 – 2.00 (2H, m), 0.99 (3H, t, *J* 7.5);  $\delta_{\text{C}}$  (400 MHz, CDCl<sub>3</sub>) 159.9 (C), 137.3 (CH), 126.9 (CH), 70.5 (CH<sub>2</sub>), 49.6 (CH), 21.0 (CH<sub>2</sub>), 14.4 (CH<sub>3</sub>); *m/z* (ES<sup>+</sup>) 164.0682 (M+Na, C<sub>7</sub>H<sub>11</sub>NNaO<sub>2</sub> requires 164.0682), 305 (24 %, 2M+Na), 164 (100, M+Na). Further elution afforded **4a** (88.6 mg, 45 %) as a yellow oil: R<sub>f</sub> = 0.12 (petroleum ether 40-60/Et<sub>2</sub>O (1:4));  $\nu_{\max}/\text{cm}^{-1}$  (film) 2969, 2939, 2907, 2879, 1720, 1469;  $\delta_{\text{H}}$  (400 MHz, CDCl<sub>3</sub>) 4.39 (1H, ddd, *J* 12.0, 10.5, 1.9), 4.33 (1H, ddd, *J* 10.5, 4.9, 1.9), 2.89 (1H, ddd, *J* 9.0, 6.9, 5.0), 2.60 (1H, ddd, *J* 8.3, 5.3, 5.0), 2.18 (1H, appddt, *J* 14.7, 6.9, 1.9), 1.86 (1H, ddq, *J* 14.8, 7.3, 5.3), 1.47 (1H, dddd, *J* 14.7, 12.0, 9.0, 4.9), 1.23 (1H, m), 1.10 (3H, appt, *J* 7.3);  $\delta_{\text{C}}$  (400 MHz, CDCl<sub>3</sub>) 158.8 (C), 68.0 (CH<sub>2</sub>), 44.1 (CH), 37.3 (CH), 19.1 (CH<sub>2</sub>), 19.1 (CH<sub>2</sub>), 10.9 (CH<sub>3</sub>); *m/z* (EI<sup>+</sup>) 142.0867 (M+H, C<sub>7</sub>H<sub>12</sub>NO<sub>2</sub> requires 142.0868), 142 (19 %, M+H), 112 (4, M-C<sub>2</sub>H<sub>5</sub>), 96 (9, M-CHO<sub>2</sub>), 82 (40, M-CO<sub>2</sub>-CH<sub>3</sub>), 68 (100, M-C<sub>3</sub>H<sub>5</sub>O<sub>2</sub>).

Prepared following General Procedure B with carbamic acid (*Z*)-hex-3-enyl ester **3** (199.5 mg, 1.39 mmol), PhIO (0.613 g, 2.78 mmol), Rh<sub>2</sub>(OAc)<sub>4</sub> (30.8 mg, 0.070 mmol) and benzene (13.9 mL). Purification was by flash column chromatography (petroleum ether 40-60/Et<sub>2</sub>O (1:2)) yielding **4b** and **2b** (34.6 mg, 18 %) in a 21:1 (*Z*:*E*) ratio as a yellow oil. The data recorded were identical with those reported previously (*vide supra*).

Supplementary Material (ESI) for Chemical Communications  
This journal is (c) The Royal Society of Chemistry 2006  
SUPPORTING INFORMATION

Further elution afforded **4a** (114.0 mg, 58 %). The data recorded were identical with those reported previously (*vide supra*).

Prepared following General Procedure B with carbamic acid (*Z*)-hex-3-enyl ester **3** (218.6 mg, 1.53 mmol), PhIO (0.672 g, 3.06 mmol), Rh<sub>2</sub>(Oct)<sub>4</sub> (59.4 mg, 0.077 mmol) and benzene (15.3 mL). Purification was by flash column chromatography (petroleum ether 40-60/Et<sub>2</sub>O (1:4)) yielding **2b** (27.0 mg, 13 %). The data were identical with those reported previously (*vide supra*). Further elution afforded **2a** (151.0 mg, 70 %). The data were identical with those reported previously (*vide supra*).

Prepared following General Procedure B with carbamic acid (*Z*)-hex-3-enyl ester **3** (41.7 mg, 0.29 mmol), PhIO (0.128 g, 0.58 mmol), Rh<sub>2</sub>(*S*-TBSP)<sub>4</sub> (21.1 mg, 0.015 mmol) and benzene (2.9 mL). Purification was by flash column chromatography (petroleum ether 40-60/Et<sub>2</sub>O (1:4)) yielding **4b** (5.3 mg, 13 %). The data recorded were identical to those reported previously (*vide supra*); *e.e.* 3 % (**4b** (5.3 mg), 25 mol% Eu(hfc)<sub>3</sub>, C<sub>6</sub>D<sub>6</sub>, CH<sub>3</sub>, 0.78/0.74 p.p.m. 1:0.95). Further elution afforded **4a** (29.2 mg, 71 %). The data recorded were identical to those reported previously (*vide supra*); *e.e.* 23% (**4a** (3.9 mg), 5 mol% Eu(hfc)<sub>3</sub>, C<sub>6</sub>D<sub>6</sub>, CH<sub>3</sub>, 0.86/0.92 p.p.m. 1:0.63).

Prepared following General Procedure B with carbamic acid (*Z*)-hex-3-enyl ester **3** (41.7 mg, 0.29 mmol), PhIO (0.128 g, 0.58 mmol), Rh<sub>2</sub>(*S*-MeOX)<sub>4</sub> (12.6 mg, 0.015 mmol) and benzene (2.9 mL). Purification was by flash column chromatography (petroleum ether 40-60/Et<sub>2</sub>O (1:4)) yielding **4b** (12.5 mg, 30 %). The data recorded were identical to those

## SUPPORTING INFORMATION

reported previously (*vide supra*); *e.e.* 10 % (**4b** (1.6 mg), 50 mol% Eu(hfc)<sub>3</sub>, C<sub>6</sub>D<sub>6</sub>, CH<sub>3</sub>, 0.70/0.74 p.p.m. 1:0.81). Further elution afforded **4a** (13.0 mg, 31 %). The data recorded were identical to those reported previously (*vide supra*); *e.e.* 11% (**4a** (4.8 mg), 10 mol% Eu(hfc)<sub>3</sub>, C<sub>6</sub>D<sub>6</sub>, CH<sub>3</sub>, 0.99/1.06 p.p.m. 1:0.80).

***Trans*-7-(acetyloxymethyl)-3-oxa-1-aza-bicyclo[4.1.0]heptan-2-one (5a) & (*E*)-3-(2-oxo-oxazolidin-4-yl)-allyl acetate (5b)**

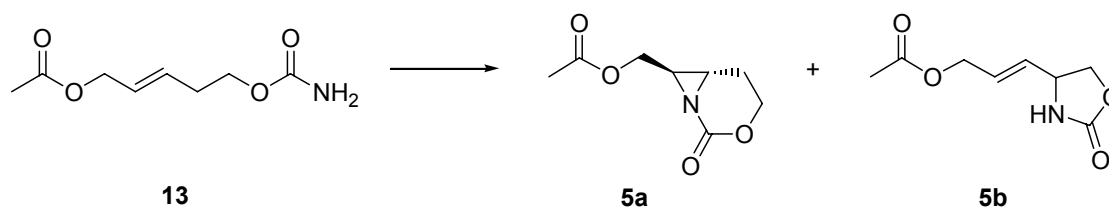

Prepared following General Procedure B with acetic acid (*E*)-5-carbamoyloxy-pent-2-enyl ester **13** (108.2 mg, 0.58 mmol), PhIO (0.254 g, 1.16 mmol), Rh<sub>2</sub>(OAc)<sub>4</sub> (12.8 mg, 0.029 mmol) and benzene (5.8 mL). Purification was by flash column chromatography (petroleum ether 40-60/EtOAc (1:3)) yielding **5b** (18.2 mg, 17 %) as a yellow oil: R<sub>f</sub> = 0.27 (petroleum ether 40-60/EtOAc (1:4));  $\nu_{\max}/\text{cm}^{-1}$  (film) 3307, 2941, 1738, 1733, 1682;  $\delta_{\text{H}}$  (400 MHz, CDCl<sub>3</sub>) 5.86 (1H, dt, *J* 15.5, 5.4), 5.75 (1H, dd, *J* 15.5, 7.3), 5.61 (1H, bs), 4.58 (2H, d, *J* 5.4), 4.55 (1H, appt, *J* 8.5), 4.46 – 4.40 (1H), 4.08 (1H, dd, *J* 8.5, 6.5), 2.10 (3H, s);  $\delta_{\text{C}}$  (400 MHz, CDCl<sub>3</sub>) 170.7(C), 159.3 (C), 131.2 (CH), 128.8 (CH), 70.0 (CH<sub>2</sub>), 63.4 (CH<sub>2</sub>), 54.3 (CH), 21.0 (CH<sub>3</sub>); *m/z* (EI+) 186.0774 (M+H, C<sub>8</sub>H<sub>12</sub>NO<sub>4</sub> requires 186.0766), 186 (6 %, M+H), 125 (100, M – C<sub>2</sub>H<sub>4</sub>O<sub>2</sub>), 67 (26). Further elution afforded **5a** (41.7 mg, 39 %) as a yellow oil: R<sub>f</sub> = 0.24 (petroleum ether 40-60/EtOAc (1:4));  $\nu_{\max}/\text{cm}^{-1}$  (film) 2960, 1733;  $\delta_{\text{H}}$  (400 MHz, CDCl<sub>3</sub>) 4.44 (1H, ddd, *J* 12.3, 10.7,



Supplementary Material (ESI) for Chemical Communications  
This journal is (c) The Royal Society of Chemistry 2006  
SUPPORTING INFORMATION

1.9), 4.34 (1H, ddd,  $J$  10.7, 4.2, 1.9), 4.20 (2H, appd,  $J$  5.5), 2.79, (1H, ddd,  $J$  8.6, 6.3, 3.1), 2.58 (1H, apptd,  $J$  5.5, 3.1), 2.41 (1H, appddt,  $J$  14.7, 6.3, 1.9), 2.12 (3H, s), 1.45 (1H, dddd,  $J$  14.7, 12.3, 8.6, 4.2);  $\delta_C$  (400 MHz,  $CDCl_3$ ) 170.8 (C), 159.9 (C), 68.2 ( $CH_2$ ), 63.8 ( $CH_2$ ), 44.9 (CH), 38.6 (CH), 24.8 ( $CH_2$ ), 20.9 ( $CH_3$ );  $m/z$  (ES+) 186.0745 (M + H,  $C_8H_{12}NO_4$  requires 186.0766), 186 (42 %, M+ H), 142 (24, M –  $CO_2$  + H), 126 (14, M – OAc), 100 (100), 68 (86, M –  $CO_2$  – AcOCH<sub>2</sub>).

***Trans*-7-(acetyloxymethyl)-3-oxa-1-aza-bicyclo[4.1.0]heptan-2-one (5a)**

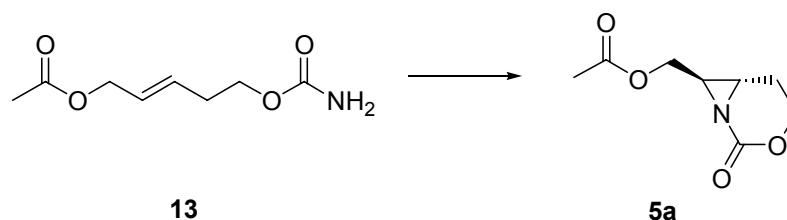

Prepared following General Procedure B with acetic acid (*E*)-5-carbamoyloxy-pent-2-enyl ester **13** (50.1 mg, 0.27 mmol), PhIO (0.118 g, 0.54 mmol),  $Rh_2(S-TBSP)_4$  (19.4 mg, 0.014 mmol) and benzene (2.7 mL). Purification was by flash column chromatography (petroleum ether 40-60/EtOAc (1:4)) yielding **5a** (38.6 mg, 78 %). The data recorded were identical with those reported previously (*vide supra*); *e.e.* 12% (**5a** (4.0 mg), 10 mol%  $Eu(hfc)_3$ ,  $C_6D_6$ ,  $CH_3$ , 1.79/1.80 p.p.m. 1:0.79).

***(E)*-3-(2-oxo-oxazolidin-4-yl)-allyl acetate (5b)**

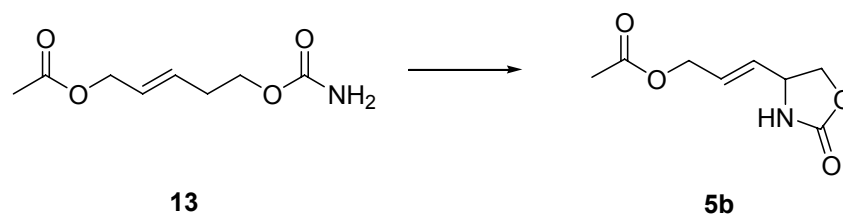

Supplementary Material (ESI) for Chemical Communications  
This journal is (c) The Royal Society of Chemistry 2006  
SUPPORTING INFORMATION

Prepared following General Procedure B with acetic acid (*E*)-5-carbamoyloxy-pent-2-enyl ester **13** (53.4 mg, 0.29 mmol), PhIO (0.126 g, 0.58 mmol), Rh<sub>2</sub>(*S*-MeOX)<sub>4</sub> (12.3 mg, 0.015 mmol) and benzene (2.9 mL). Purification was by flash column chromatography (petroleum ether 40-60/EtOAc (1:4)) yielding recovered **13** (9.8 mg, 18 %). Further elution afforded **5b** (17.4 mg, 33 %). The data recorded were identical with those reported previously (*vide supra*); *e.e.* 16% (**5b** (3.3 mg), 10 mol% Eu(hfc)<sub>3</sub>, C<sub>6</sub>D<sub>6</sub>, CH<sub>3</sub>, 1.65/1.67 p.p.m. 1:0.73).

**Trans-7-(benzyloxymethyl)-3-oxa-1-aza-bicyclo[4.1.0]heptan-2-one (6a) & 4-((*E*)-3-benzyloxy-propenyl)-oxazolidin-2-one (6b)**

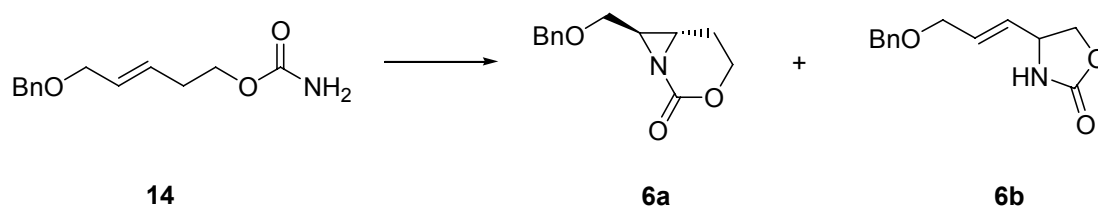

Prepared following General Procedure B with carbamic acid (*E*)-5-benzyloxy-pent-3-enyl ester **14** (224.9 mg, 0.96 mmol), PhIO (0.421 g, 1.92 mmol), Rh<sub>2</sub>(OAc)<sub>4</sub> (21.1 mg, 0.048 mmol) and benzene (9.6 mL). Purification was by flash column chromatography (petroleum ether 40-60/Et<sub>2</sub>O (1:4) to neat Et<sub>2</sub>O) yielding recovered **14** (30.2 mg, 13 %). Further elution yielded **6b** (17.8 mg, 8 %) as a yellow oil: R<sub>f</sub> = 0.22 (Et<sub>2</sub>O); ν<sub>max</sub>/cm<sup>-1</sup> (film) 3300, 2915, 2856, 1750, 1651; δ<sub>H</sub> (400 MHz, CDCl<sub>3</sub>) 7.37 – 7.30 (5H, m), 5.88 (1H, dt, *J* 15.5, 5.1), 5.76 (1H, dd, *J* 15.5, 7.6), 4.99 (1H, bs), 4.55 (2H, s), 4.54 (1H, appt, *J* 8.5), 4.44 – 4.39 (1H, m), 4.07 (1H, dd, *J* 8.5, 6.7), 4.04 (2H, dd, *J* 5.1, 1.0); δ<sub>C</sub> (500 MHz, CDCl<sub>3</sub>) 159.0 (C), 137.9 (C), 131.6 (CH), 129.6 (CH), 128.6 (2 × CH), 128.0 (CH), 127.9 (2 × CH), 73.0 (CH<sub>2</sub>), 70.2 (CH<sub>2</sub>), 69.4 (CH<sub>2</sub>), 54.6 (CH); *m/z* (EI<sup>+</sup>)

## Supplementary Material (ESI) for Chemical Communications

This journal is (c) The Royal Society of Chemistry 2006

## SUPPORTING INFORMATION

142.0510 (M-Bn, C<sub>6</sub>H<sub>8</sub>NO<sub>3</sub> requires 142.0504), 234 (4 %, M+H), 127 (32, M-OBn+H), 91 (100, Bn). Further elution afforded **6a** (69.1 mg, 31 %) as a yellow oil: R<sub>f</sub> = 0.29 (petroleum ether 40-60/EtOAc (1:2));  $\nu_{\max}/\text{cm}^{-1}$  (film) 3030, 2904, 2861, 1725;  $\delta_{\text{H}}$  (500 MHz, CDCl<sub>3</sub>) 7.49 – 7.29 (5H, m), 4.65 (1H, d, *J* 11.9), 4.60 (1H, d, *J* 11.9), 4.42 (1H, ddd, *J* 12.4, 10.6, 1.9), 4.32 (1H, ddd, *J* 10.6, 4.2, 1.9), 3.80 (1H, dd, *J* 11.1, 4.7), 3.53 (1H, dd, *J* 11.1, 5.3), 2.78 (1H, ddd, *J* 8.7, 6.3, 3.2), 2.52 (1H, ddd, *J* 5.3, 4.7, 3.2), 2.37 (1H, appddt, *J* 14.7, 6.3, 1.9), 1.42 (1H, dddd, *J* 14.7, 12.4, 8.7, 4.2);  $\delta_{\text{C}}$  (500 MHz, CDCl<sub>3</sub>) 160.5 (C), 137.7 (C), 128.6 (2 × CH), 128.1 (3 × ArCH), 73.5 (CH<sub>2</sub>), 69.3 (CH<sub>2</sub>), 68.3 (CH<sub>2</sub>), 46.4 (CH), 38.3 (CH), 24.9 (CH<sub>2</sub>); *m/z* (ES<sup>+</sup>) 256.0953 (M + Na, C<sub>13</sub>H<sub>15</sub>NNaO<sub>3</sub> requires 256.0950), 489 (54 %, 2M + Na), 256 (100, M + Na), 190 (2, M – CO<sub>2</sub> + H).

**Trans-7-(benzyloxymethyl)-3-oxa-1-aza-bicyclo[4.1.0]heptan-2-one (6a)**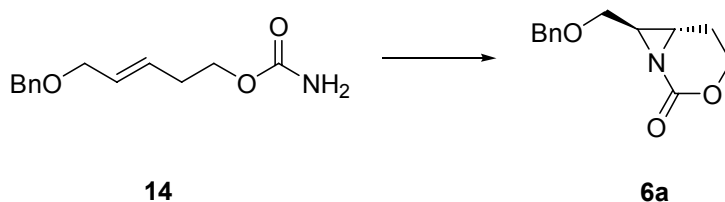

Prepared following General Procedure B with carbamic acid (E)-5-benzyloxy-pent-3-enyl ester **14** (66.0 mg, 0.28 mmol), PhIO (0.123 g, 0.56 mmol), Rh<sub>2</sub>(S-TBSP)<sub>4</sub> (20.3 mg, 0.014 mmol) and benzene (2.8 mL). Purification was by flash column chromatography (petroleum ether 40-60/EtOAc (1:2)) yielding **6a** (43.3 mg, 66 %). The data recorded were identical to those reported previously (*vide supra*); e.e. 18% (**6a** (4.4 mg), 10 mol% Eu(hfc)<sub>3</sub>, C<sub>6</sub>D<sub>6</sub>, NCH, 2.32/2.39 p.p.m. 1:0.70).

**Spirocyclic aziridine (7a), 4-cyclohex-1-enyl-oxazolidin-2-one (7b) & carbamic acid****2-(7-oxa-bicyclo[4.1.0]hept-1-yl)-ethyl ester (16)**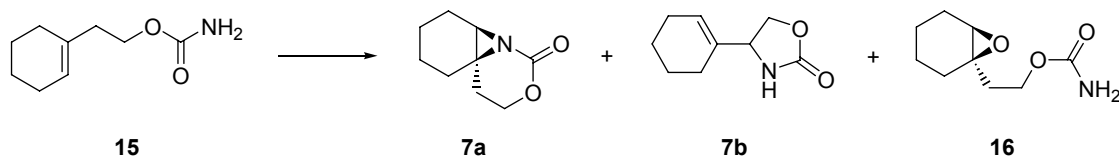

Prepared following General Procedure B with carbamic acid 2-cyclohex-1-enyl-ethyl ester **15** (210.9 mg, 1.15 mmol), PhIO (0.548 g, 2.30 mmol),  $\text{Rh}_2(\text{OAc})_4$  (27.5 mg, 0.058 mmol) and benzene (12.5 mL). Purification was by flash column chromatography (petroleum ether 40-60/ $\text{Et}_2\text{O}$  (1:4)) yielding recovered **15** (30.9 mg, 15 %), and an impure orange oil containing **7b** and **16**. Further elution afforded **7a** (53.8 mg, 26 %) as a white solid: mp 75.0 – 76.5 °C;  $R_f = 0.14$  (petroleum ether 40-60/ $\text{Et}_2\text{O}$  (1:4));  $\nu_{\text{max}}/\text{cm}^{-1}$  (ATR) 2935, 2866, 1705;  $\delta_{\text{H}}$  (400 MHz,  $\text{CDCl}_3$ ) 4.42 (1H, ddd,  $J$  12.4, 10.7, 1.9), 4.27 (1H, ddd,  $J$  10.7, 4.0, 2.0), 2.56 (1H, appd,  $J$  5.0), 2.18 – 2.06 (3H, m), 1.96 – 1.91 (1H, m), 1.67 (1H, ddd,  $J$  14.1, 8.6, 5.5), 1.56 – 1.47 (3H, m), 1.40 – 1.39 (1H, m), 1.29 – 1.25 (1H, m);  $\delta_{\text{C}}$  (500 MHz,  $\text{CDCl}_3$ ) 162.1, (C), 67.0 ( $\text{CH}_2$ ), 49.0 (CH), 42.9 (C), 32.7 ( $\text{CH}_2$ ), 29.5 ( $\text{CH}_2$ ), 24.0 ( $\text{CH}_2$ ), 20.0 ( $\text{CH}_2$ ), 19.6 ( $\text{CH}_2$ );  $m/z$  (EI+) 167.0945 (M,  $\text{C}_9\text{H}_{13}\text{NO}_2$  requires 167.0946), 167 (22 %, M), 94 (100, M-H- $\text{CH}_2\text{OC}(\text{O})\text{NH}_2$ ), 67 (59, M- $\text{C}_4\text{H}_6\text{NO}_2$ ). The mixture of **7b** and **16** was purified by flash column chromatography over  $\text{SiO}_2$  (2 % MeOH/ $\text{CH}_2\text{Cl}_2$ ) to yield **7b** (9.3 mg, 5 %) as a white solid: mp 53.0-55.0 °C;  $R_f = 0.20$  (petroleum ether 40-60/ $\text{Et}_2\text{O}$  (1:4));  $\nu_{\text{max}}/\text{cm}^{-1}$  (ATR) 3249, 2932, 2856, 1727, 1707;  $\delta_{\text{H}}$  ( $\text{CDCl}_3$ , 400 MHz) 5.74 – 5.73 (1H, m), 5.14 (1H, bs), 4.49 (1H, appt,  $J$  8.5), 4.31 (1H, dd,  $J$  8.5, 6.1), 4.11 (1H, dd,  $J$  8.5, 6.1), 2.04 – 2.02 (2H, m,  $\text{CH}_2$ ), 1.99 – 1.94 (2H, m,  $\text{CH}_2$ ), 1.71 – 1.55 (4H, m,  $2 \times \text{CH}_2$ );  $\delta_{\text{C}}$  ( $\text{CDCl}_3$ , 400 MHz) 159.7 (C), 135.0 (C), 126.1

## Supplementary Material (ESI) for Chemical Communications

This journal is (c) The Royal Society of Chemistry 2006

## SUPPORTING INFORMATION

(CH), 69.4 (CH<sub>2</sub>), 58.3 (CH), 25.0 (CH<sub>2</sub>), 23.2 (CH<sub>2</sub>), 22.4 (CH<sub>2</sub>), 22.3 (CH<sub>2</sub>); *m/z* (EI+) 167.0950 (M, C<sub>9</sub>H<sub>13</sub>NO<sub>2</sub> requires 167.0946), 167 (100 %, M), 138 (39, M-C<sub>2</sub>H<sub>5</sub>), 108 (25, M-C<sub>2</sub>H<sub>3</sub>O<sub>2</sub>). Further elution afforded **16** (5.8 mg, 3 %) as a white solid: mp 68.0 – 69.0 °C; *R<sub>f</sub>* = 0.08 (petroleum ether 40-60/Et<sub>2</sub>O (1:1));  $\nu_{\max}/\text{cm}^{-1}$  (ATR) 3375, 3262, 3207, 2940, 2867, 1716, 1622;  $\delta_{\text{H}}$  (400 MHz, CDCl<sub>3</sub>) 4.69 (2H, bs), 4.24 (1H, appdt, *J* 11.1, 6.5), 4.16 (1H, appdt, *J* 11.1, 6.5), 3.00 (1H, appd, *J* 3.4), 1.97 – 1.74 (6H, m), 1.50 – 1.38 (2H, m), 1.32 – 1.19 (2H, m);  $\delta_{\text{C}}$  (500 MHz, CDCl<sub>3</sub>) 156.7 (C), 61.7 (CH<sub>2</sub>), 58.4 (CH), 58.1 (C), 37.1 (CH<sub>2</sub>), 28.1 (CH<sub>2</sub>), 24.8 (CH<sub>2</sub>), 20.2 (CH<sub>2</sub>), 19.6 (CH<sub>2</sub>); *m/z* (ES+) 208.0941 (M+Na, C<sub>9</sub>H<sub>15</sub>NO<sub>3</sub> requires 208.0949), 208 (100 %, M+Na), 125 (26, M-OC(O)NH<sub>2</sub>).

**Spirocyclic aziridine (7a)**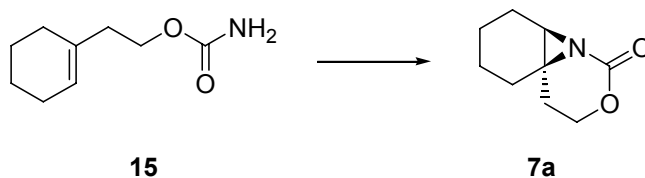

Prepared following General Procedure B with carbamic acid 2-cyclohex-1-enyl-ethyl-ester **15** (102.4 mg, 0.61 mmol), PhIO (0.266 g, 1.22 mmol), Rh<sub>2</sub>(*S*-TBSP)<sub>4</sub> (36.9 mg, 0.026 mmol) and benzene (6.05 mL). Purification was by flash column chromatography (petroleum ether 40-60/Et<sub>2</sub>O (1:7)) yielding **7a** as a white solid (60.4 mg, 60 %). The data recorded were identical to those reported previously (*vide supra*); *e.e.* 8% (**7a** (2.0 mg), 20 mol% Eu(hfc)<sub>3</sub>, C<sub>6</sub>D<sub>6</sub>, CHHO, 4.11/4.25 p.p.m. 1:0.86).

**6-Methyl-3-oxa-1-aza-bicyclo[4.1.0]heptan-2-one (8a) & 4-isopropenyl-oxazolidin-2-one (8b)**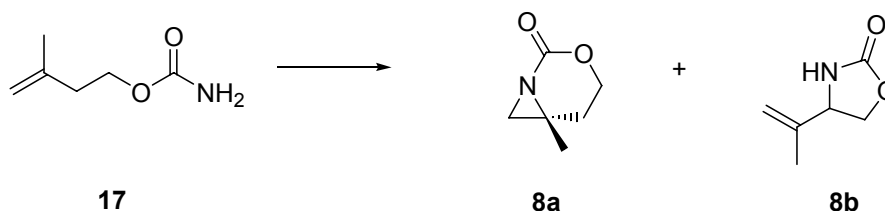

Prepared following General Procedure B with carbamic acid 3-methyl-but-3-enyl ester **17** (271 mg, 2.10 mmol), PhIO (0.924 g, 4.20 mmol),  $\text{Rh}_2(\text{OAc})_4$  (46.4 mg, 0.105 mmol) and benzene (21.0 mL). Purification was by flash column chromatography (petroleum ether 40-60/ $\text{Et}_2\text{O}$  (1:1)) yielding recovered starting material (77.5 mg, 29 %). Further elution afforded **8b** (15.4 mg, 5 %) as a white solid: mp 48.0 – 49.5 °C;  $R_f = 0.15$  (petroleum ether 40-60/ $\text{Et}_2\text{O}$  (1:4));  $\nu_{\text{max}}/\text{cm}^{-1}$  (ATR) 3234, 3136, 1730, 1656;  $\delta_{\text{H}}$  (400 MHz,  $\text{CDCl}_3$ ) 5.04 (1H, bd,  $J$  0.8 & 1H, bs), 4.97 (1H, bs), 4.55 (1H, appt,  $J$  8.7), 4.38 (1H, dd,  $J$  8.8, 6.1), 4.11 (1H, dd,  $J$  8.5, 6.1), 1.78 (3H, s);  $\delta_{\text{C}}$  (500 MHz,  $\text{CDCl}_3$ ) 159.3 (C), 142.4 (C), 113.9 ( $\text{CH}_2$ ), 69.3 ( $\text{CH}_2$ ), 57.7 (CH), 17.3 ( $\text{CH}_3$ );  $m/z$  (ES+)  $\text{M}+\text{Na}$  (150.0525,  $\text{C}_6\text{H}_9\text{NNaO}_2$  requires 150.0525), 150 (100 %,  $\text{M}+\text{Na}$ ), 128 (22,  $\text{M}+\text{H}$ ). Further elution afforded **8a** (92.7 mg, 35 %) as a yellow oil;  $R_f = 0.12$  ( $\text{Et}_2\text{O}$ );  $\nu_{\text{max}}/\text{cm}^{-1}$  (ATR) 2969, 1698;  $\delta_{\text{H}}$  (400 MHz,  $\text{CDCl}_3$ ) 4.45 (1H, ddd,  $J$  12.4, 10.7, 1.9), 4.31 (1H, ddd,  $J$  10.7, 4.0, 2.0), 2.40 (1H, s), 2.20 (1H, s), 2.12 (1H, appdt,  $J$  14.5, 1.9), 1.48 (1H, ddd,  $J$  14.5, 12.4, 4.0), 1.39 (3H, s);  $\delta_{\text{C}}$  (400 MHz,  $\text{CDCl}_3$ ) 161.8 (C), 66.8 ( $\text{CH}_2$ ), 42.6 ( $\text{CH}_2$ ), 39.6 (C), 30.9 ( $\text{CH}_2$ ), 22.1 ( $\text{CH}_3$ );  $m/z$  (EI+) 128.0707 ( $\text{M}+\text{H}$ ,  $\text{C}_6\text{H}_{10}\text{NO}_2$  requires 128.0712), 128 (20 %,  $\text{M}+\text{H}$ ), 82 (46,  $\text{C}_5\text{H}_8\text{N}$ ), 68 (17,  $\text{M}-\text{C}_2\text{H}_3\text{O}_2$ ), 55 (100).

***Anti*-1-(2-oxo-[1,3]-oxazinan-4-yl)-propyl acetate (9)**

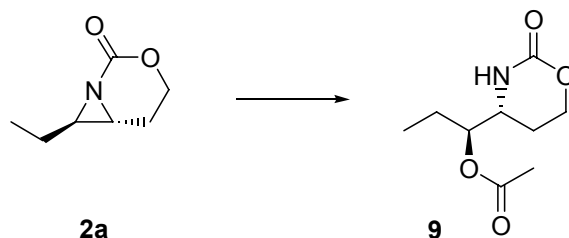

Glacial AcOH (2.0 eq., 0.09 mL, 1.54 mmol) was added dropwise to a stirring ice-cooled solution of *trans*-7-ethyl-3-oxa-1-aza-bicyclo[4.1.0]heptan-2-one **2a** (108.7 mg, 0.77 mmol) in THF (2.0 mL). The reaction mixture was then allowed to attain 23 °C, and after complete consumption of starting material (48 h.) the reaction mixture was taken up with water (5 mL) and CHCl<sub>3</sub> (5 mL). The aqueous layer was neutralised by addition of sat. aq. NaCO<sub>3</sub>. The aqueous layer was extracted with CHCl<sub>3</sub> (3 × 5 mL), dried (MgSO<sub>4</sub>) and concentrated by evaporation under reduced pressure to yield a yellow oil. This was purified by flash column chromatography over SiO<sub>2</sub> (NH<sub>3</sub>-saturated petroleum ether 40-60/EtOAc (1:3)) to yield **9** (122.4 mg, 88 %) as a white solid: mp 77.0 – 78.5 °C; R<sub>f</sub> = 0.15 (petroleum ether 40-60/EtOAc (1:3)); ν<sub>max</sub>/cm<sup>-1</sup> (ATR) 3237, 3127, 2976, 1727; δ<sub>H</sub> (400 MHz, CDCl<sub>3</sub>) 5.36 (1H, bs), 4.92 (1H, td, *J* 6.6, 4.3), 4.37 (1H, dt, *J* 11.2, 4.3), 4.20 (1H, ddd, *J* 11.2, 9.8, 3.5), 3.67 (1H, dddd, *J* 9.9, 5.4, 4.3, 1.1), 2.11 (3H, s), 1.99 – 1.85 (2H, m), 1.67 – 1.60 (2H, m), 0.95 (3H, t, *J* 7.4); δ<sub>C</sub> (400 MHz, CDCl<sub>3</sub>) 171.0 (C), 154.0 (C), 75.0 (CH), 65.3 (CH<sub>2</sub>), 53.5 (CH), 22.6 (CH<sub>2</sub>), 22.4 (CH<sub>2</sub>), 21.1 (CH<sub>3</sub>), 10.0 (CH<sub>3</sub>); *m/z* (ES<sup>+</sup>) 224.0898 (M+Na, C<sub>9</sub>H<sub>15</sub>NNaO<sub>4</sub> requires 224.0893), 425 (44 %, 224 (100, M+Na).

**Syn-1-(2-oxo-[1,3]-oxazinan-4-yl)-propyl acetate (10)**

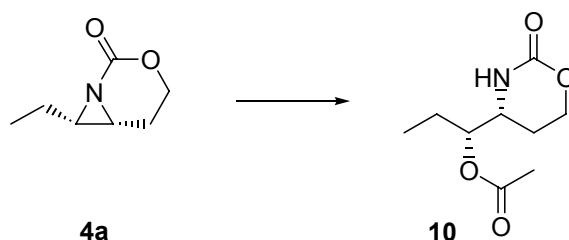

Glacial AcOH (2.0 eq., 0.09 mL, 1.54 mmol) was added dropwise to a stirring ice-cooled solution of *cis*-7-ethyl-3-oxa-1-aza-bicyclo[4.1.0]heptan-2-one **4a** (108.7 mg, 0.77 mmol) in THF (2.0 mL). The reaction mixture was then allowed to attain 23 °C and was stirred for 48 h. The reaction mixture was diluted with CHCl<sub>3</sub> (5 mL) and water (5 mL), and the aq. layer neutralised with sat. aq. NaHCO<sub>3</sub> solution. The aq. layer was extracted with CHCl<sub>3</sub> (3 × 5 mL), dried (MgSO<sub>4</sub>) and concentrated by evaporation under reduced pressure to afford a yellow oil. This was purified by flash column chromatography over SiO<sub>2</sub> (NH<sub>3</sub>-saturated petroleum ether 40-60/EtOAc (1:3)) to yield **10** (115.1 mg, 74 %) a white solid: mp 104.0 – 106.0 °C; R<sub>f</sub> = 0.13 (petroleum ether 40-60/EtOAc (1:3));  $\nu_{\max}/\text{cm}^{-1}$  (ATR) 3246, 3127, 2936, 1721, 1700;  $\delta_{\text{H}}$  (400 MHz, CDCl<sub>3</sub>) 5.50 (1H, bs, NH), 4.77 (1H, td, *J* 7.3, 4.3), 4.36 (1H, dt, *J* 11.1, 4.2), 4.22 (1H, td, *J* 11.1, 2.8), 3.65 – 3.60 (1H, m), 2.14 (3H, s), 2.03 – 1.96 (1H, m), 1.84 – 1.69 (2H, m), 1.63 – 1.52 (1H, m), 0.93 (3H, t, *J* 7.5);  $\delta_{\text{C}}$  (400 MHz, CDCl<sub>3</sub>) 170.7 (C), 153.8 (C), 76.6 (CH), 65.2 (CH<sub>2</sub>), 52.5 (CH), 24.2 (CH<sub>2</sub>), 23.6 (CH<sub>2</sub>), 21.1 (CH<sub>3</sub>), 9.2 (CH<sub>3</sub>); *m/z* (ES<sup>+</sup>) 202.1080 (M+H, C<sub>9</sub>H<sub>16</sub>NO<sub>4</sub> requires 202.1074), 425 (42 %, 2M+Na), 403 (20, 2M+H), 224 (81, M+Na), 202 (100, M+H), 142 (10, M+H).

**Anti-4-(1-chloro-propyl)-[1,3]oxazinan-2-one (11)**



Supplementary Material (ESI) for Chemical Communications  
This journal is (c) The Royal Society of Chemistry 2006  
SUPPORTING INFORMATION

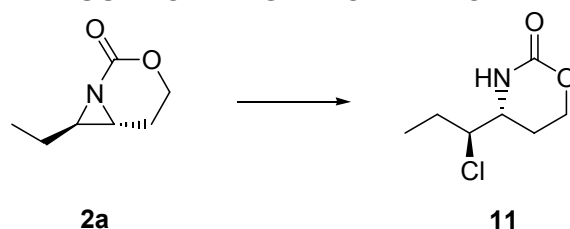

HCl (1N, 0.25 mL) was added to a solution of *trans*-7-ethyl-3-oxa-1-azabicyclo[4.1.0]heptan-2-one **2a** (35.3 mg, 0.25 mmol) in 1,4-dioxane (0.5 mL) and water (0.5 mL) at 23 °C for 24 h. The reaction mixture was extracted with CH<sub>2</sub>Cl<sub>2</sub> (10 mL) and the aq. layer neutralised with aq. K<sub>2</sub>CO<sub>3</sub>. The aqueous layer was extracted with CH<sub>2</sub>Cl<sub>2</sub> (3 × 10 mL) and the combined organic layers dried (MgSO<sub>4</sub>) and concentrated under reduced pressure to afford a white solid. This was purified by flash column chromatography over SiO<sub>2</sub> (5 % MeOH/CH<sub>2</sub>Cl<sub>2</sub>) to yield **11** (27.7 mg, 62 %) as a white solid: (found: C, 46.92; H, 6.69; N, 7.49; C<sub>7</sub>H<sub>12</sub>ClNO<sub>2</sub> requires C, 47.33; H, 6.81; N, 7.89); mp 81.0 – 82.0 °C; R<sub>f</sub> = 0.32 (5 % MeOH/CH<sub>2</sub>Cl<sub>2</sub>); ν<sub>max</sub>/cm<sup>-1</sup> (ATR) 3230, 3125, 2675, 1686, 1494; δ<sub>H</sub> (400 MHz, CDCl<sub>3</sub>) 6.06 (1H, bs), 4.36 (1H, ddd, *J* 11.3, 5.0, 4.3), 4.25 (1H, ddd, *J* 11.3, 9.0, 3.7), 3.83 (1H, ddd, *J* 9.5, 6.0, 3.2), 3.71 (1H, apptdd, *J* 6.6, 6.0, 1.4), 2.16 – 2.02 (2H, m), 1.91 (1H, dqd, *J* 14.5, 7.3, 3.2), 1.71 (1H, ddq, *J* 14.5, 9.5, 7.3), 1.11 (3H, t, *J* 7.3); δ<sub>C</sub> (400 MHz, CDCl<sub>3</sub>) 154.3 (C), 66.1 (CH), 64.9 (CH<sub>2</sub>), 55.2 (CH), 26.6 (CH<sub>2</sub>), 23.7 (CH<sub>2</sub>), 11.1 (CH<sub>3</sub>); *m/z* (EI<sup>+</sup>) 177.0548 (M, C<sub>7</sub>H<sub>12</sub><sup>35</sup>ClNO<sub>2</sub> requires 177.0557), 177 (5 %, M), 100 (100, M-C<sub>3</sub>H<sub>6</sub>Cl), 56 (95).

***Syn*-4-(1-phenylsulfanyl-propyl)-[1,3]oxazinan-2-one (12)**

Supplementary Material (ESI) for Chemical Communications  
This journal is (c) The Royal Society of Chemistry 2006  
SUPPORTING INFORMATION

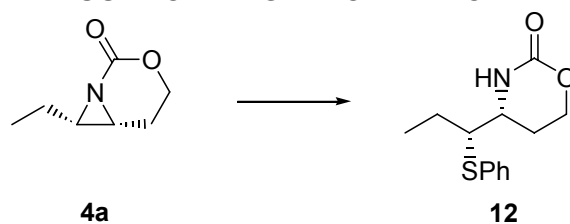

PhSH (1.2 eq., 88  $\mu$ L, 0.86 mmol) was added to a solution of *cis*-7-ethyl-3-oxa-1-azabicyclo[4.1.0]heptan-2-one **4a** (101 mg, 0.72 mmol) in  $\text{CH}_2\text{Cl}_2$  (1.0 mL) at 23  $^\circ\text{C}$ . After stirring at 23  $^\circ\text{C}$  for 14 h. the reaction mixture was concentrated by evaporation under reduced pressure, and the resulting white/brown solid was purified by flash column chromatography over  $\text{SiO}_2$  ( $\text{NH}_3$ -saturated petroleum ether 40-60/EtOAc (1:1)) to afford **12** (163.4 mg, 91 %) as a white solid: mp 124.0 – 126.0  $^\circ\text{C}$ ;  $R_f$  = 0.08 ( $\text{NH}_3$ -saturated petroleum ether 40-60/EtOAc (1:1));  $\nu_{\text{max}}/\text{cm}^{-1}$  (ATR) 3255, 3132, 2968, 1689;  $\delta_{\text{H}}$  (400 MHz,  $\text{CDCl}_3$ ) 7.47 – 7.43 (2H, m), 7.36 – 7.32 (3H, m), 6.00 (1H, bs), 4.37 (1H, ddd,  $J$  11.2, 4.2, 2.9), 4.17 (1H, apptd,  $J$  11.6, 2.3), 3.39 (1H, ddd,  $J$  10.5, 8.5, 4.8), 2.73 (1H, ddd,  $J$  9.5, 8.5, 3.5), 2.12 – 2.06 (1H, m), 1.85 – 1.72 (2H, m), 1.42 (1H, ddq,  $J$  14.5, 9.5, 7.3), 1.17 (3H, t,  $J$  7.3);  $\delta_{\text{C}}$  (400 MHz,  $\text{CDCl}_3$ ) 153.8 (C), 133.8 (2  $\times$  CH), 132.2 (C), 129.4 (2  $\times$  CH), 128.4 (CH), 65.7 ( $\text{CH}_2$ ), 57.6 (CH), 53.2 (CH), 25.9 ( $\text{CH}_2$ ), 23.2 ( $\text{CH}_2$ ), 11.5 ( $\text{CH}_3$ );  $m/z$  (ES+) 252.1046 (M+H,  $\text{C}_{13}\text{H}_{18}\text{NO}_2\text{S}$  requires 252.1064) 525 (63 %, 2M+Na), 503 (20, 2M+H), 274 (60, M+Na), 252 (100, M+H).
